# Supplementary material
Source: PubMed Central journal article supplement (PMC5924617)

# Supporting Information

## Discovery of Potent and Selective BRD4 Inhibitors Capable of Blocking TLR3-Induced Acute Airway Inflammation

Zhiqing Liu,<sup>a,1</sup> Bing Tian,<sup>b,c,1</sup> Haiying Chen,<sup>a</sup> Pingyuan Wang,<sup>a</sup>

Allan R. Brasier<sup>b,c,d</sup> and Jia Zhou<sup>a,c,d,\*</sup>

<sup>a</sup>Chemical Biology Program, Department of Pharmacology and Toxicology, <sup>b</sup>Department of Internal Medicine, <sup>c</sup>Sealy Center for Molecular Medicine, <sup>d</sup>Institute for Translational Sciences, University of Texas Medical Branch, Galveston, TX 77555, USA

<sup>1</sup>These authors contribute equally to this work.

Corresponding author: \*Tel: 409-772-9748. Fax: 409-772-9648. E-mail: [jizhou@utmb.edu](mailto:jizhou@utmb.edu).

### Table of content

|                                                                                             |   |
|---------------------------------------------------------------------------------------------|---|
| <b>Figure S1:</b> Molecular docking of <b>35</b> into BRD2 BD1                              | 2 |
| <b>Figure S2:</b> Assessment of chronic treatment of compound <b>35</b> on mouse physiology | 3 |
| <b>Table S1:</b> Off-target screening through Eurofins Cerep panel assays                   | 4 |
| Copies of <sup>1</sup> H and <sup>13</sup> C NMR spectra                                    | 6 |

**Figure S1.** Molecular docking of **35** into BRD2 BD1. Docking result of **35** with BRD2 BD1 (PDB code: 4A9M).

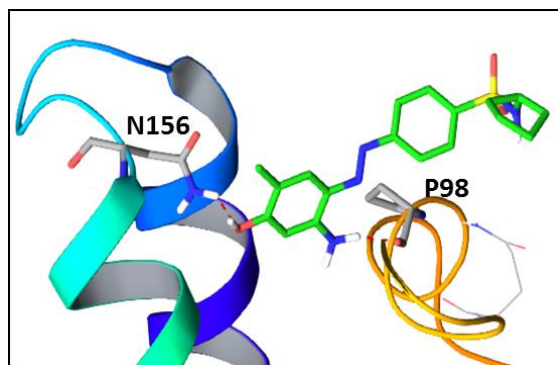

**Figure S2.** Assessment of chronic treatment of compound **35** on mouse physiology.

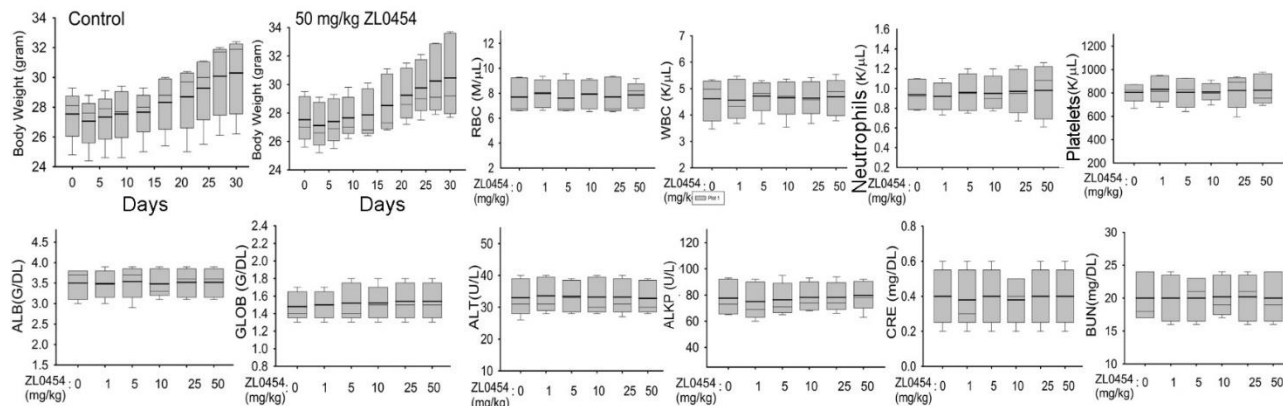

Groups of  $n = 5$  mice were exposed to **35** from 0-50 mg/kg daily (IP). **A.** Effect on body weight. 30 d later, animals were sacrificed and hematological measurements were made (**B**) for red blood cells (RBCs), white blood cells (WBCs), neutrophils, and platelets. **C.** Liver function tests for albumin (ALB), globulin (GLOB), alanine aminotransferase (ALT), and alkaline phosphatase (ALKP). **D.** renal function. Data are shown as 10-90% confidence. No significant difference between groups (ANOVA).

**Table S1.** Off-target screening of compound **35** through Eurofins Cerep panel assays<sup>a</sup>

| Receptors/Enzymes                                                           | %     |
|-----------------------------------------------------------------------------|-------|
| A <sub>2A</sub> ( <i>h</i> ) (agonist radioligand)                          | 38.1  |
| α <sub>1A</sub> ( <i>h</i> ) (agonist radioligand)                          | 17.2  |
| α <sub>2A</sub> ( <i>h</i> ) (agonist radioligand)                          | 3.0   |
| β <sub>1</sub> ( <i>h</i> ) (agonist radioligand)                           | 7.4   |
| B <sub>2</sub> ( <i>h</i> ) (agonist radioligand)                           | -2.4  |
| BZD (central) (agonist radioligand)                                         | 8.3   |
| CB <sub>1</sub> ( <i>h</i> ) (agonist radioligand)                          | 24.7  |
| CB <sub>2</sub> ( <i>h</i> ) (agonist radioligand)                          | 59.3  |
| CCK <sub>1</sub> (CCK <sub>A</sub> ) ( <i>h</i> ) (agonist radioligand)     | 17.4  |
| D <sub>1</sub> ( <i>h</i> ) (antagonist radioligand)                        | 21.9  |
| D <sub>2s</sub> ( <i>h</i> ) (agonist radioligand)                          | 36.9  |
| ETA ( <i>h</i> ) (agonist radioligand)                                      | -4.3  |
| NMDA (antagonist radioligand)                                               | 17.0  |
| H <sub>1</sub> ( <i>h</i> ) (antagonist radioligand)                        | 7.1   |
| H <sub>2</sub> ( <i>h</i> ) (antagonist radioligand)                        | -10.1 |
| MAO-A (antagonist radioligand)                                              | 49.8  |
| M <sub>1</sub> ( <i>h</i> ) (antagonist radioligand)                        | -1.5  |
| M <sub>2</sub> ( <i>h</i> ) (antagonist radioligand)                        | 21.6  |
| M <sub>3</sub> ( <i>h</i> ) (antagonist radioligand)                        | 4.8   |
| N neuronal α <sub>4</sub> β <sub>2</sub> ( <i>h</i> ) (agonist radioligand) | -2.9  |
| δ (DOP) ( <i>h</i> ) (agonist radioligand)                                  | -2.7  |
| κ (KOP) (agonist radioligand)                                               | 8.9   |

|                                                                             |       |
|-----------------------------------------------------------------------------|-------|
| $\mu$ (MOP) ( <i>h</i> ) (agonist radioligand)                              | 17.4  |
| 5-HT <sub>1A</sub> ( <i>h</i> ) (agonist radioligand)                       | -0.1  |
| 5-HT <sub>1B</sub> ( <i>h</i> ) (antagonist radioligand)                    | -9.6  |
| 5-HT <sub>3</sub> ( <i>h</i> ) (antagonist radioligand)                     | -12.9 |
| GR ( <i>h</i> ) (agonist radioligand)                                       | 15.0  |
| V <sub>1a</sub> ( <i>h</i> ) (agonist radioligand)                          | 32.4  |
| Ca <sup>2+</sup> channel (L, dihydropyridine site) (antagonist radioligand) | 42.0  |
| Potassium Channel hERG (human)- [3H] Dofetilide                             | 23.6  |
| K <sub>v</sub> channel (antagonist radioligand)                             | 8.5   |
| Na <sup>+</sup> channel (site 2) (antagonist radioligand)                   | 27.7  |
| 5-HT transporter ( <i>h</i> ) (antagonist radioligand)                      | 15.0  |
| COX1( <i>h</i> )                                                            | 41.6  |
| COX1( <i>h</i> )                                                            | 28.2  |
| PDE3A ( <i>h</i> )                                                          | 46.0  |
| PDE4D2 ( <i>h</i> )                                                         | 39.4  |
| Lck kinase ( <i>h</i> )                                                     | -20.6 |
| acetylcholinesterase ( <i>h</i> )                                           | 11.7  |
| IKK $\alpha$ ( <i>h</i> )                                                   | -14.2 |
| IKK $\epsilon$ ( <i>h</i> ) (IKBKE)                                         | -26.2 |

<sup>a</sup>The panel assay screening was conducted by Eurofins Pharma Discovery Services (<https://www.eurofinsdiscoveryservices.com/>). Compound **35** was tested at the concentration of 10  $\mu$ M. Compound binding was calculated as a % inhibition of the binding of a radioactively labeled ligand specific for each target. Compound enzyme inhibition effect was calculated as a % inhibition of control enzyme activity. Results are reported as mean of two independent measurements.

# Copies of $^1\text{H}$ and $^{13}\text{C}$ NMR spectra

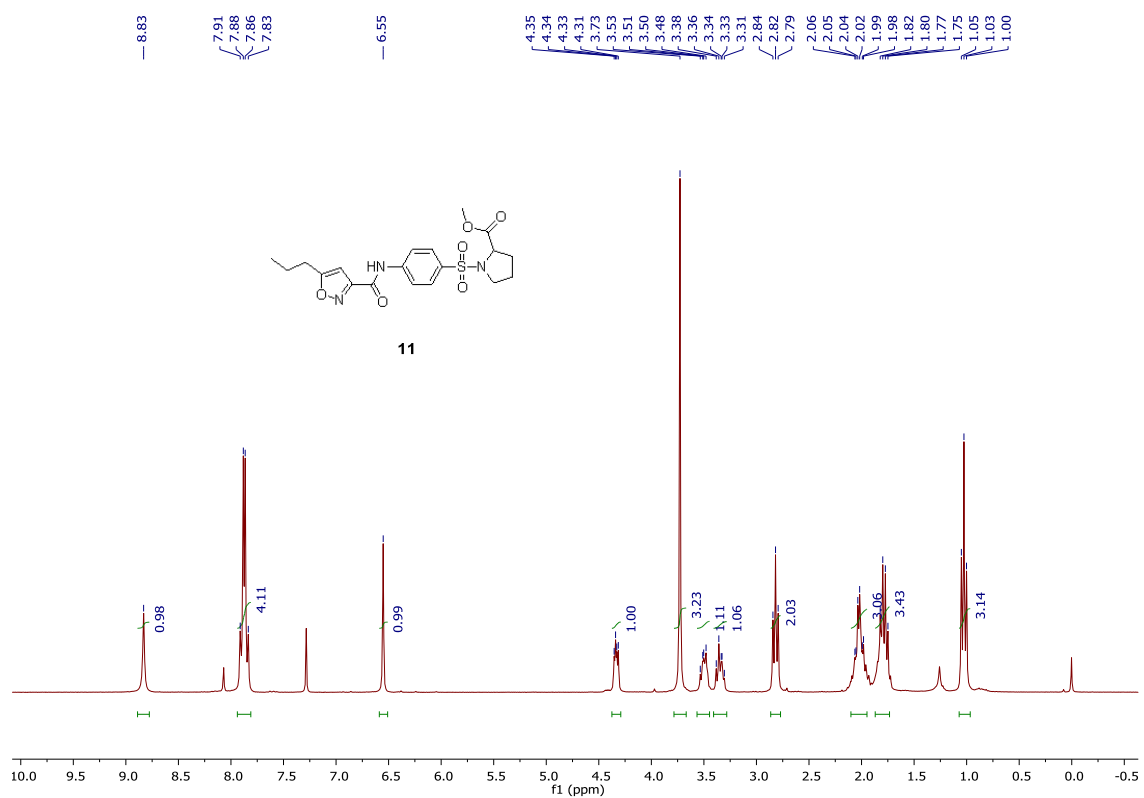

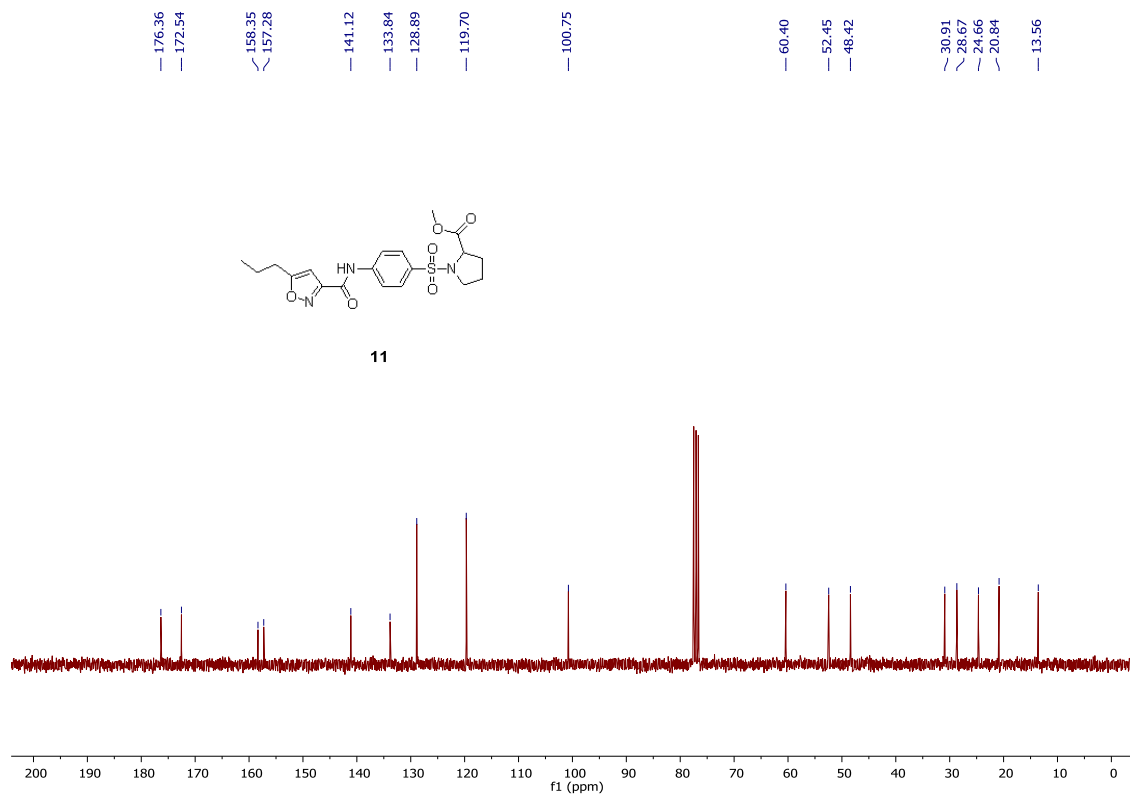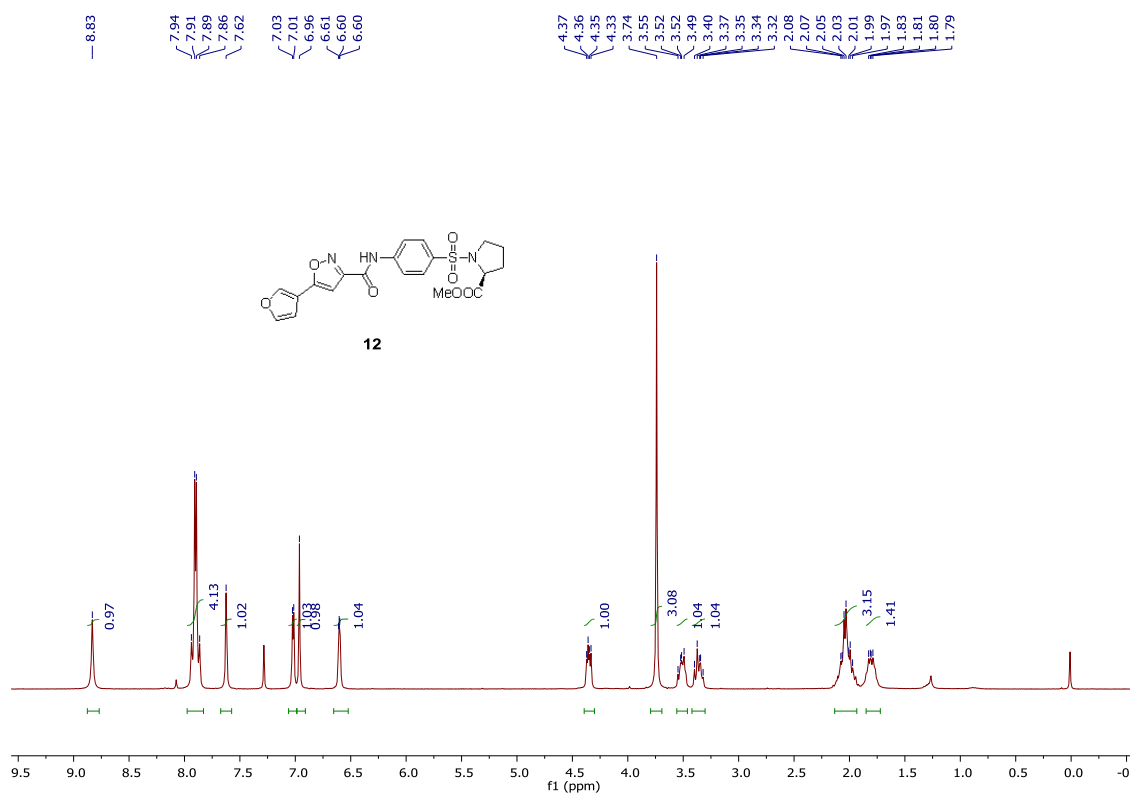

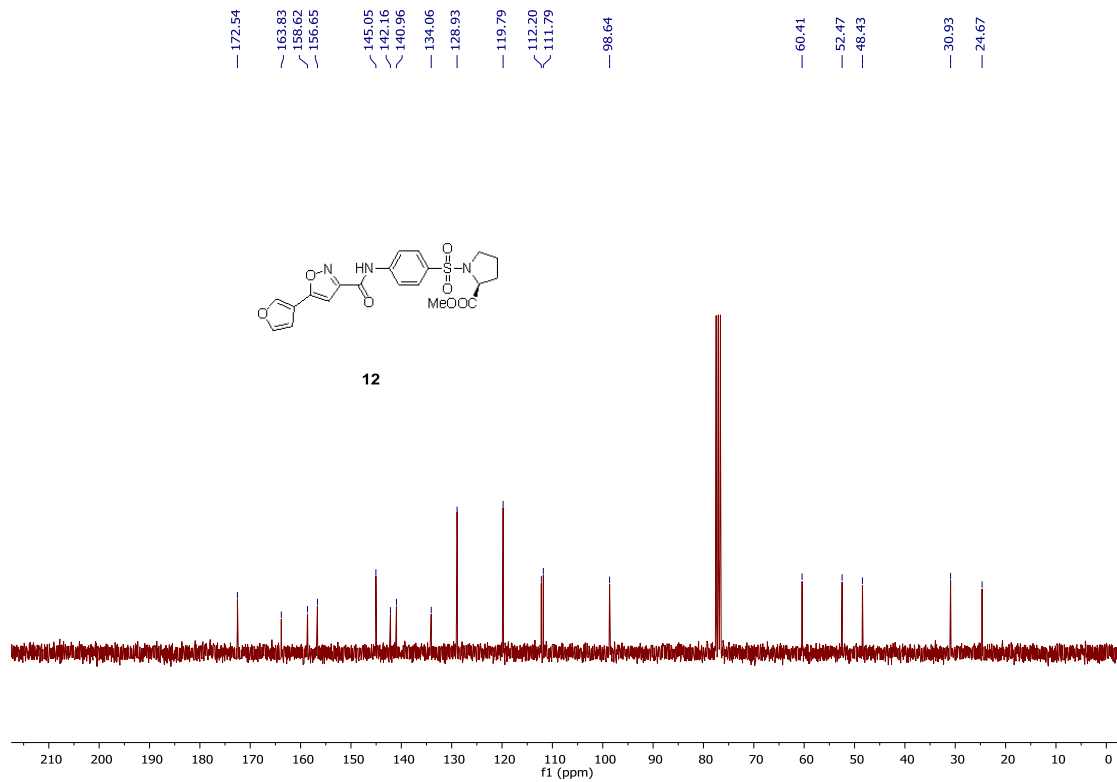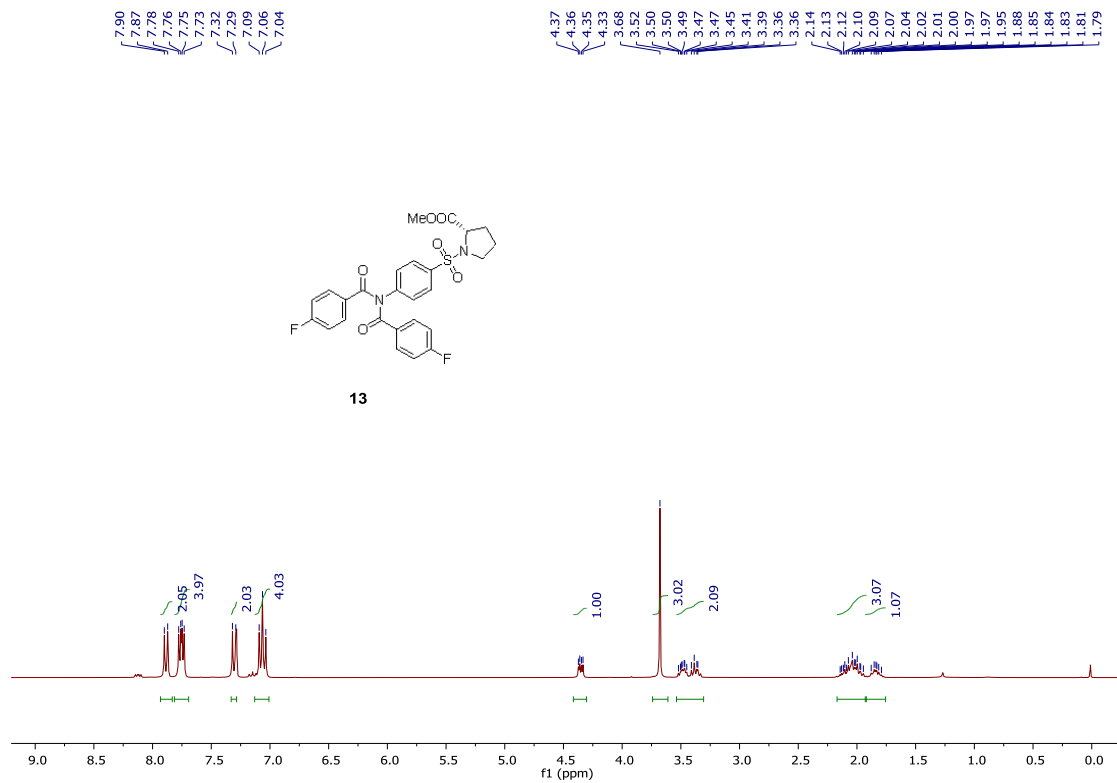



172.31  
171.86  
167.05  
163.65

143.97  
137.59  
132.03  
131.91  
130.12  
128.88  
127.96  
116.32  
116.02

60.40  
52.42  
48.40

30.91  
24.62

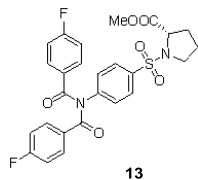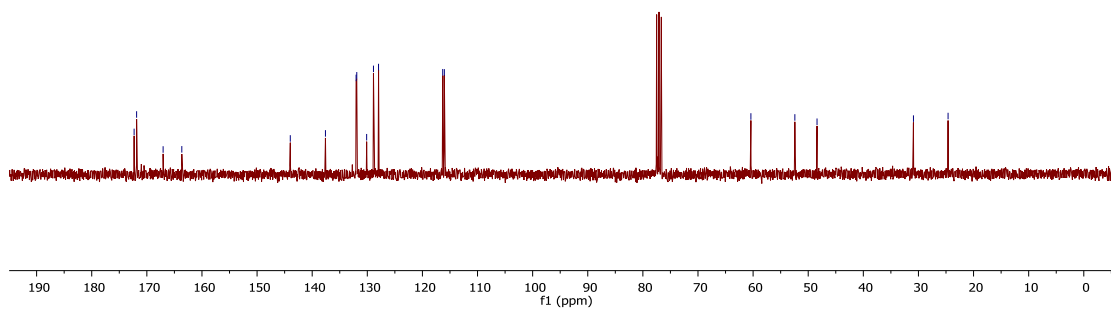

8.04  
8.02  
7.90  
7.87  
7.82  
7.79  
7.74  
7.72

4.27  
4.24  
3.70  
3.48  
3.46  
3.32  
3.29  
3.27

2.00  
1.98  
1.77  
1.75

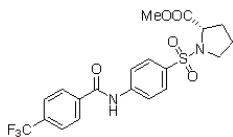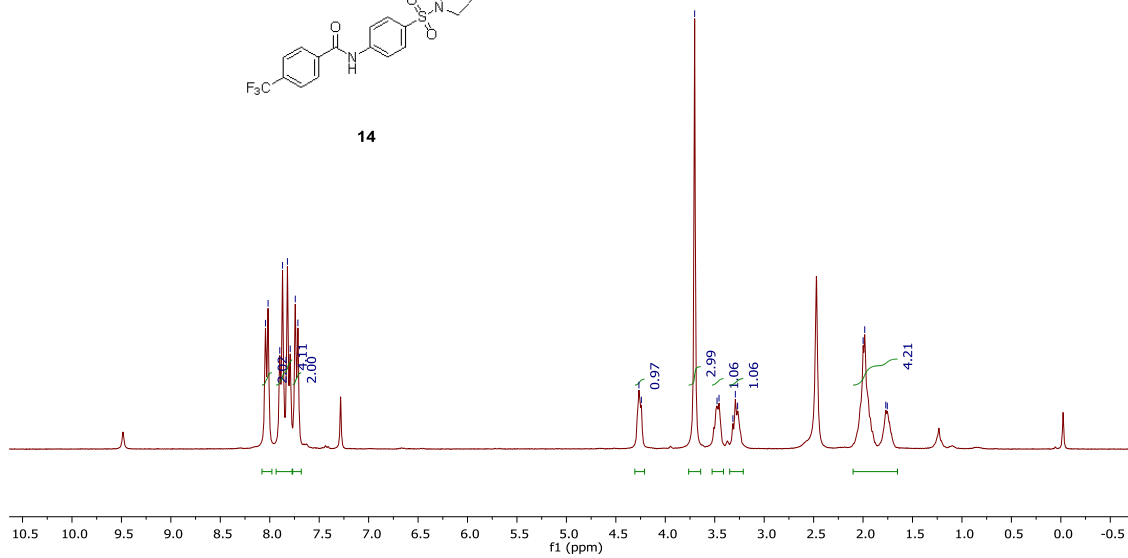

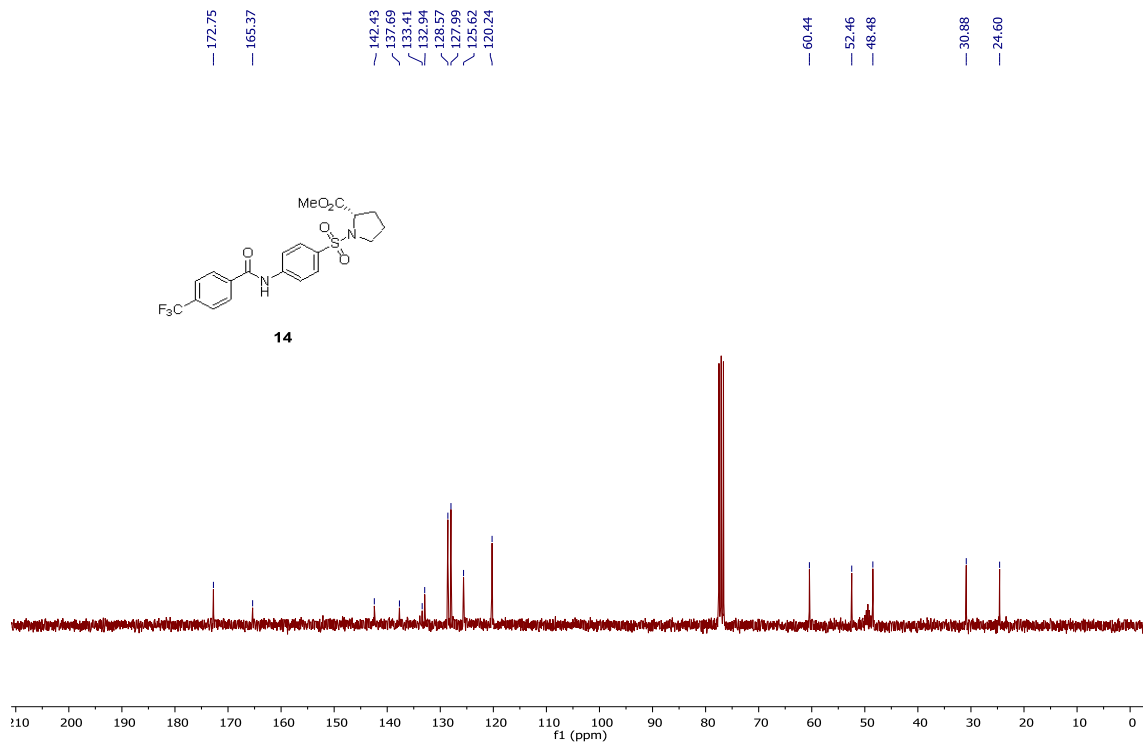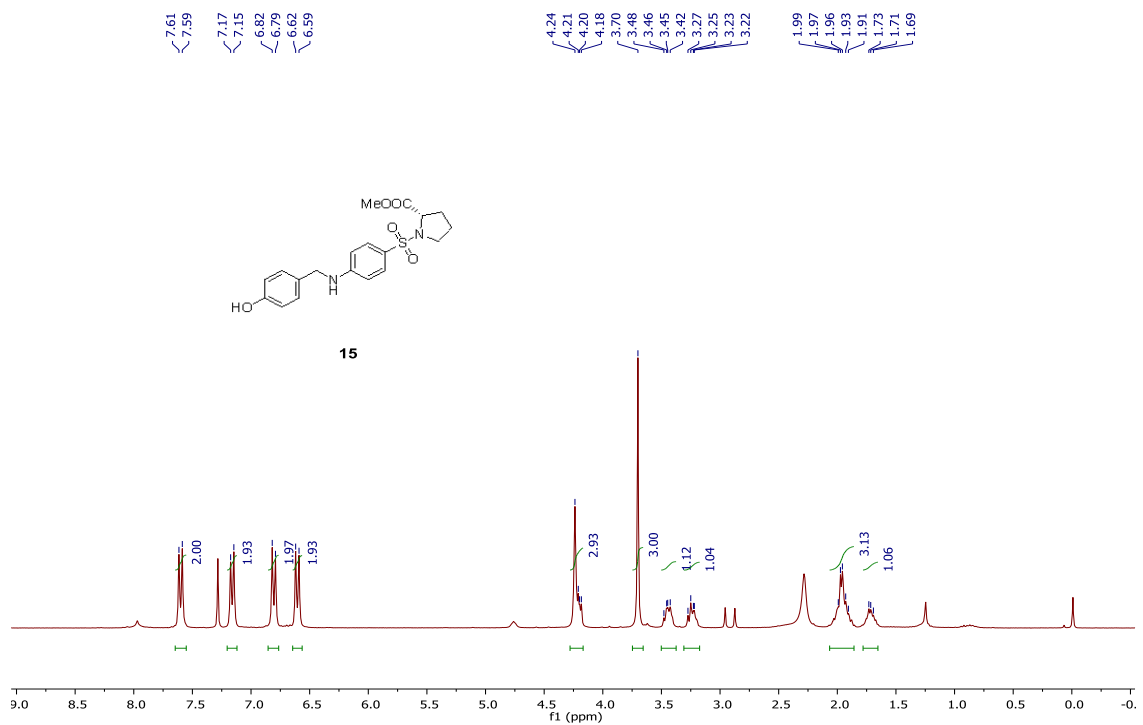

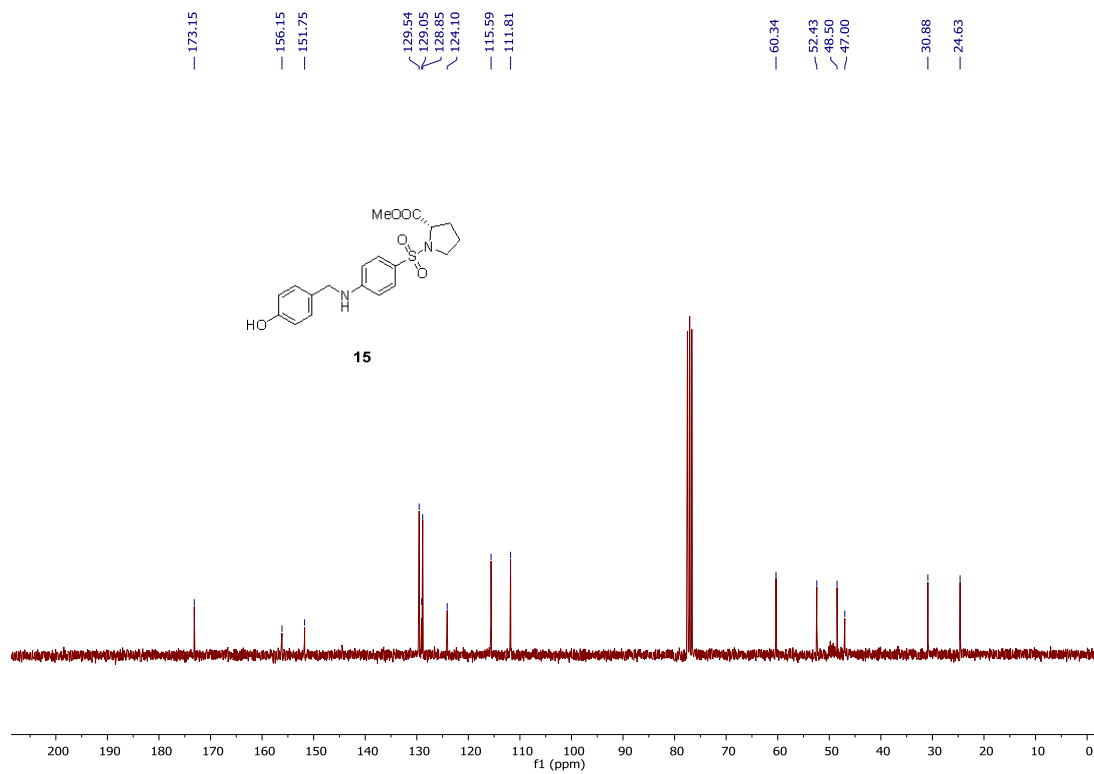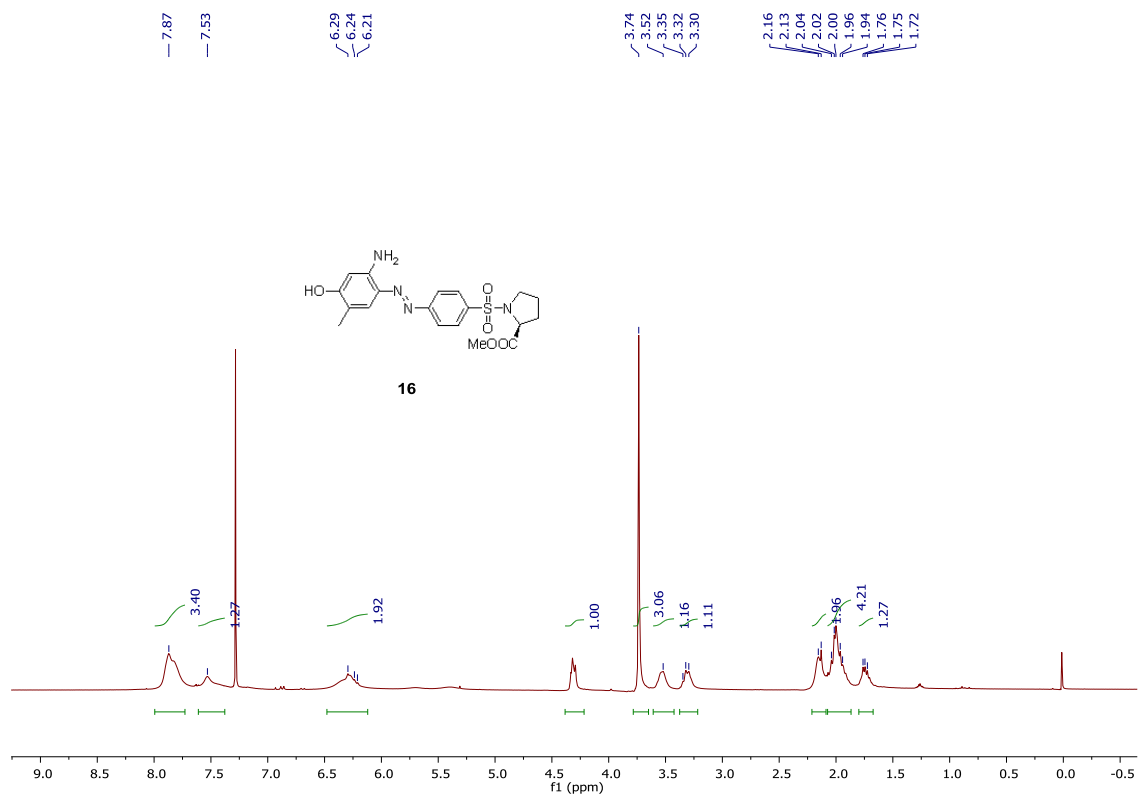

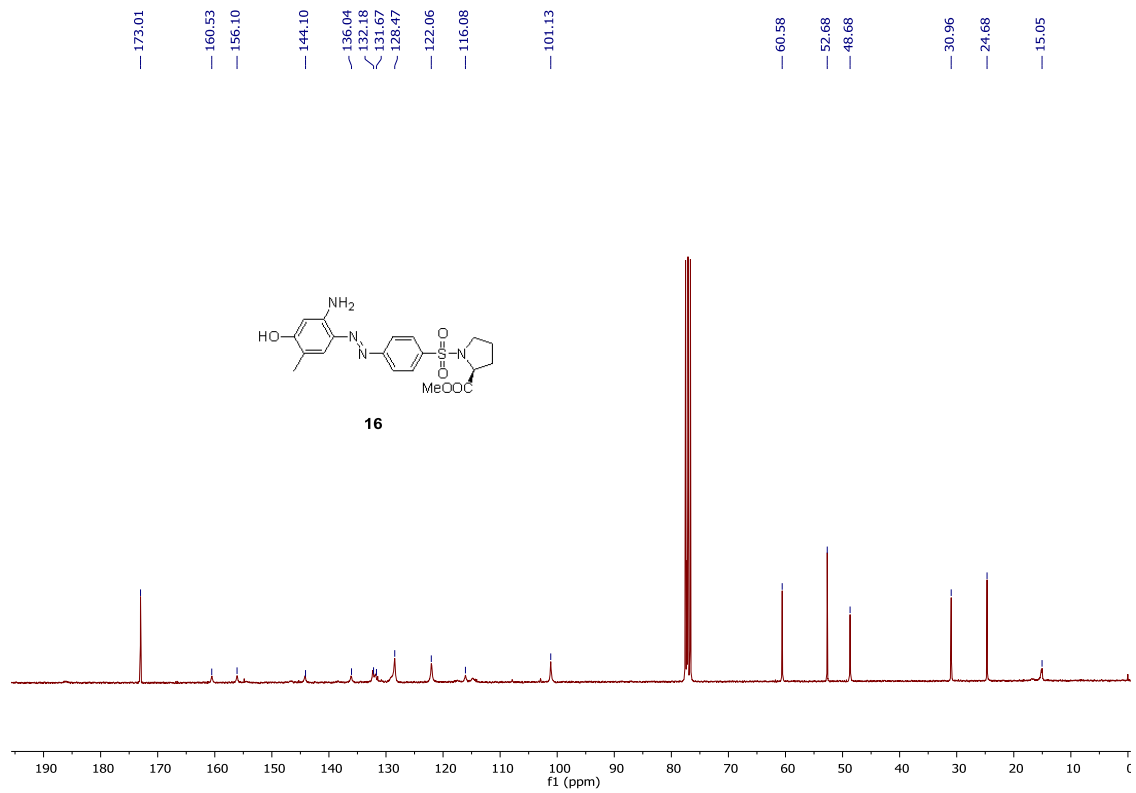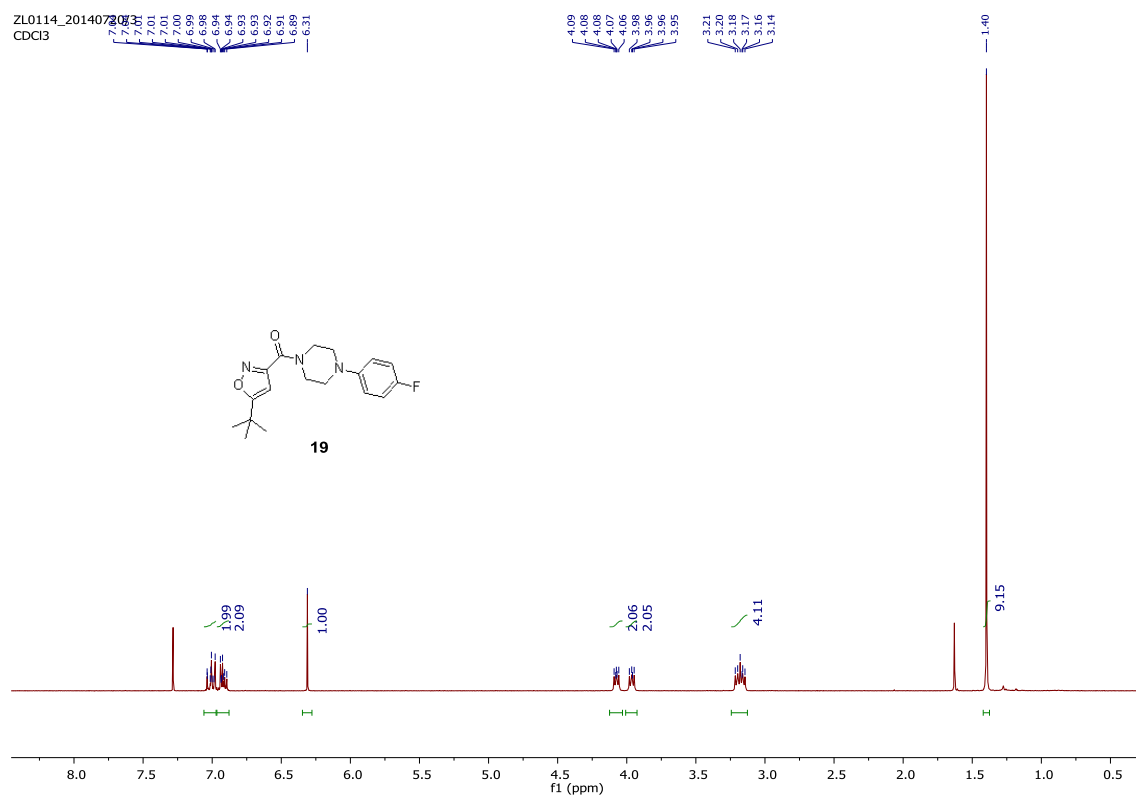

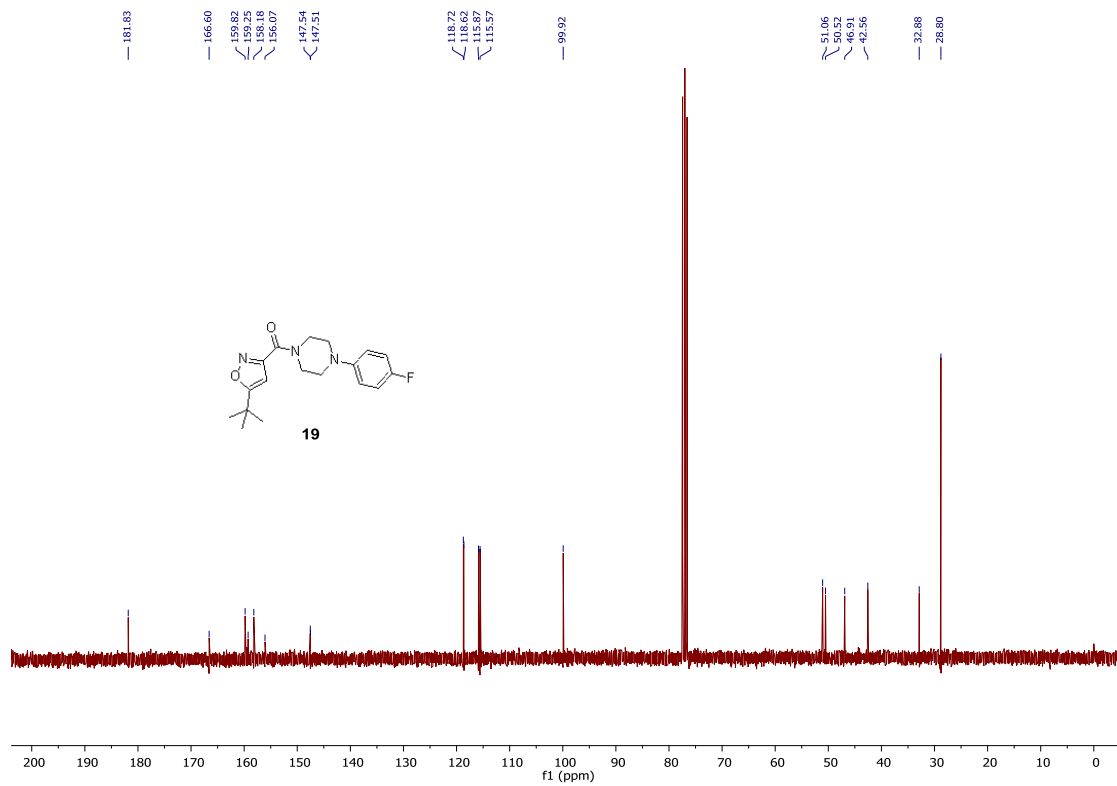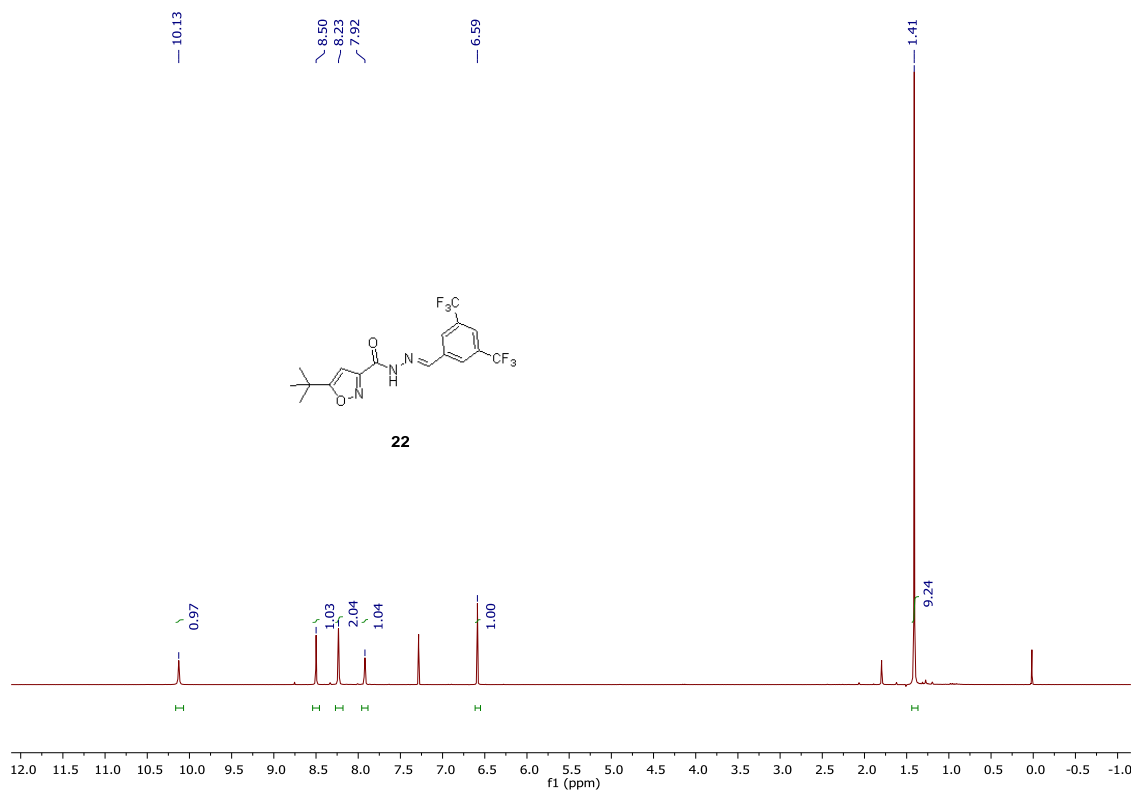

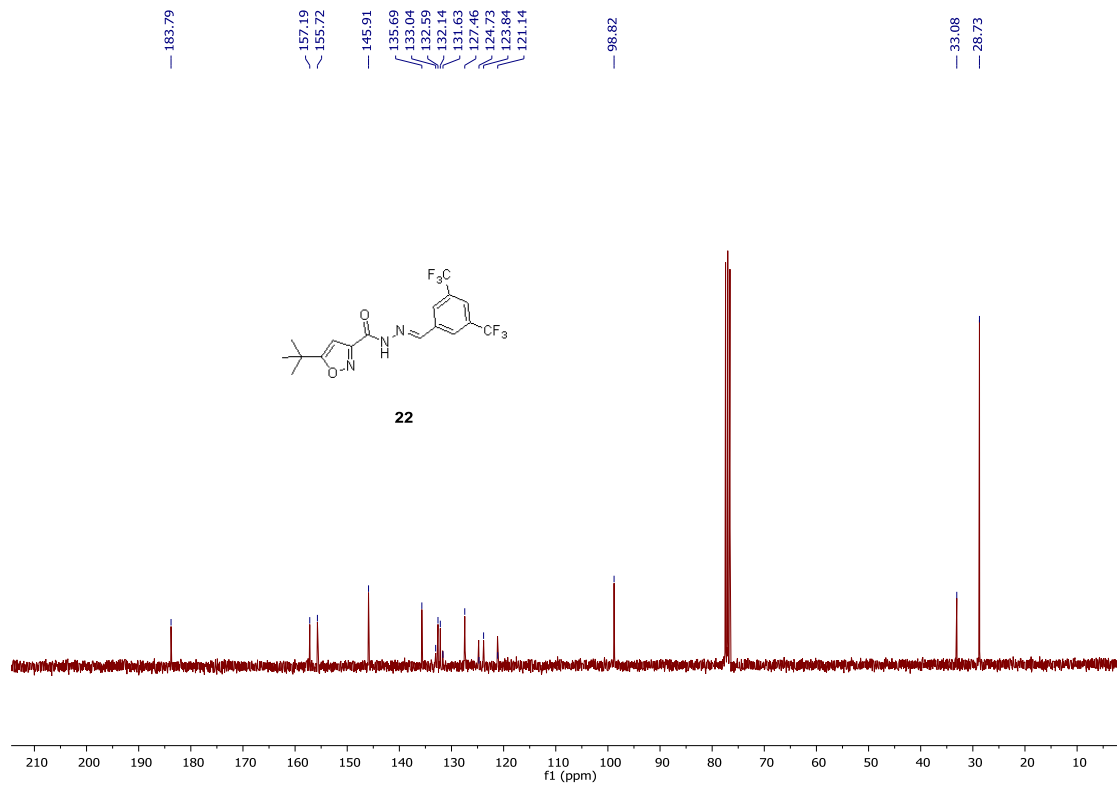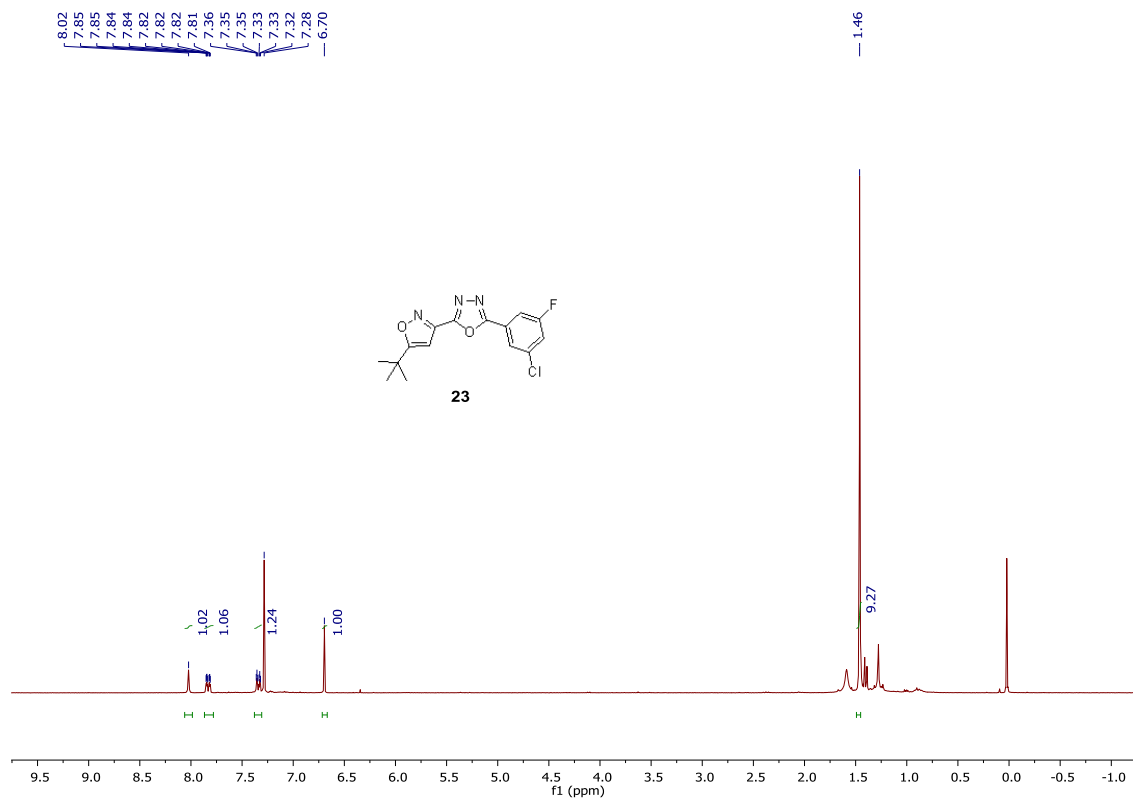

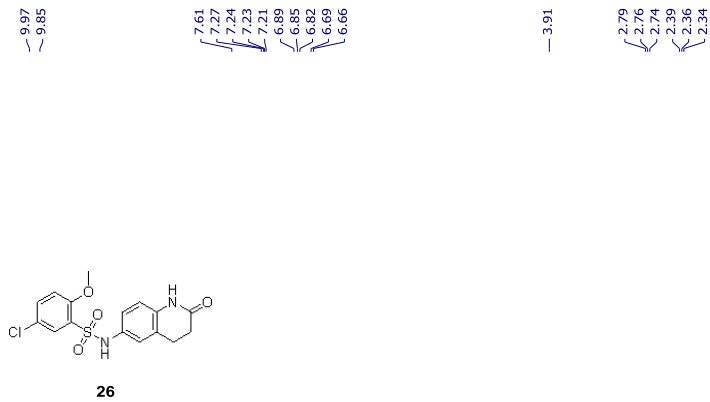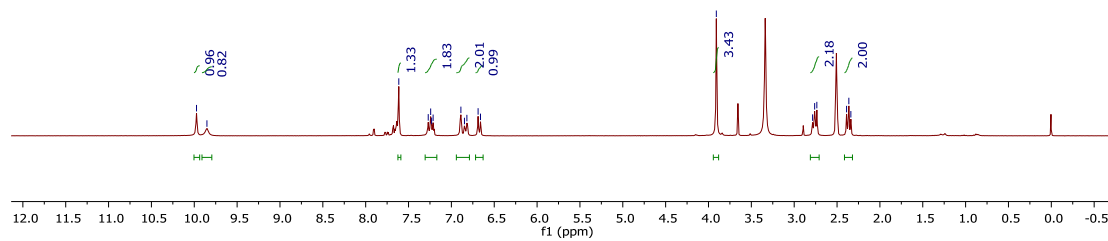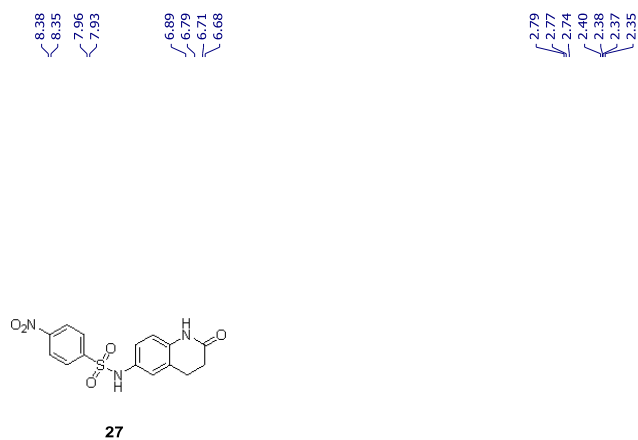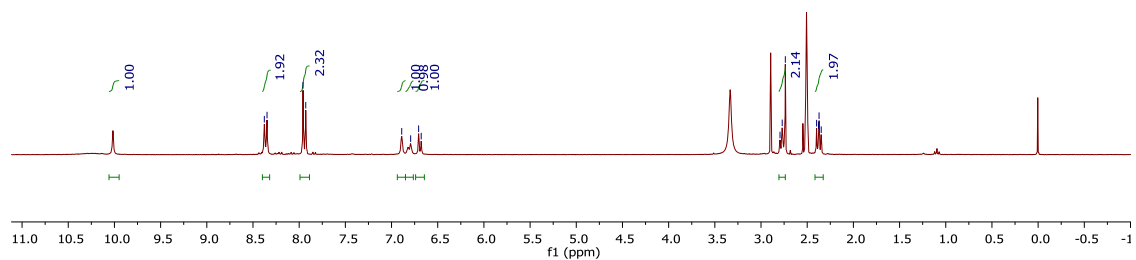

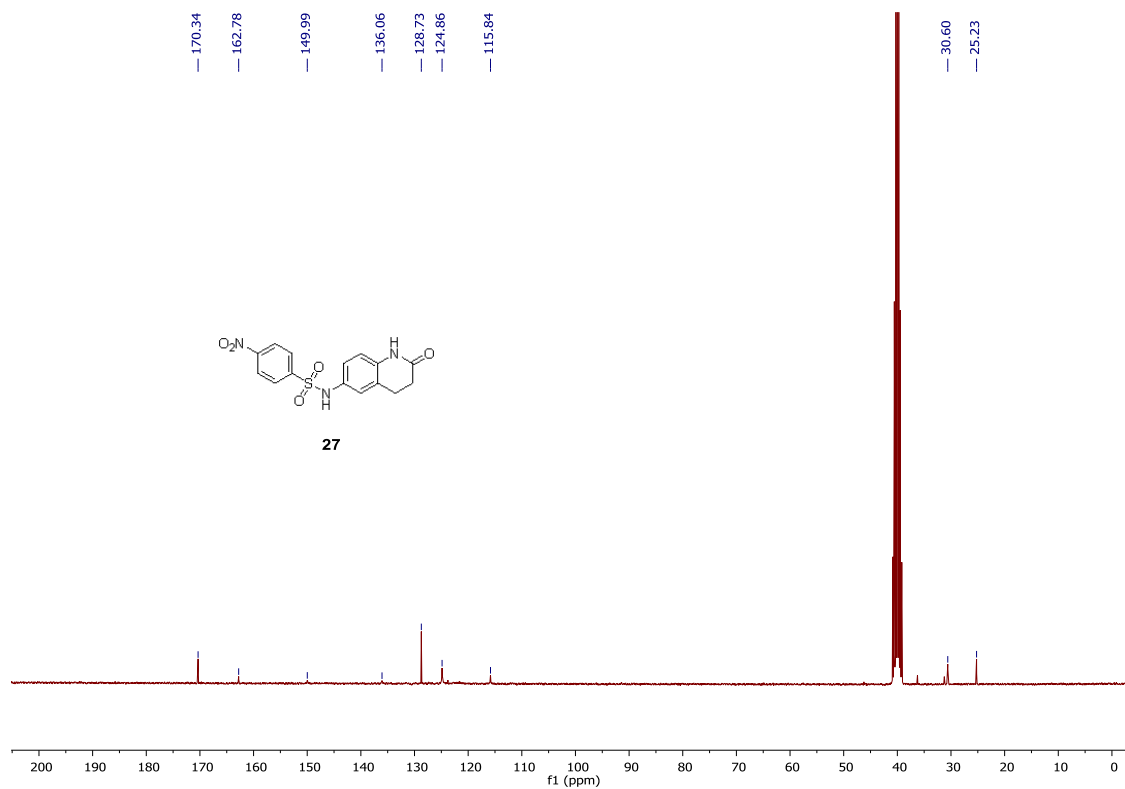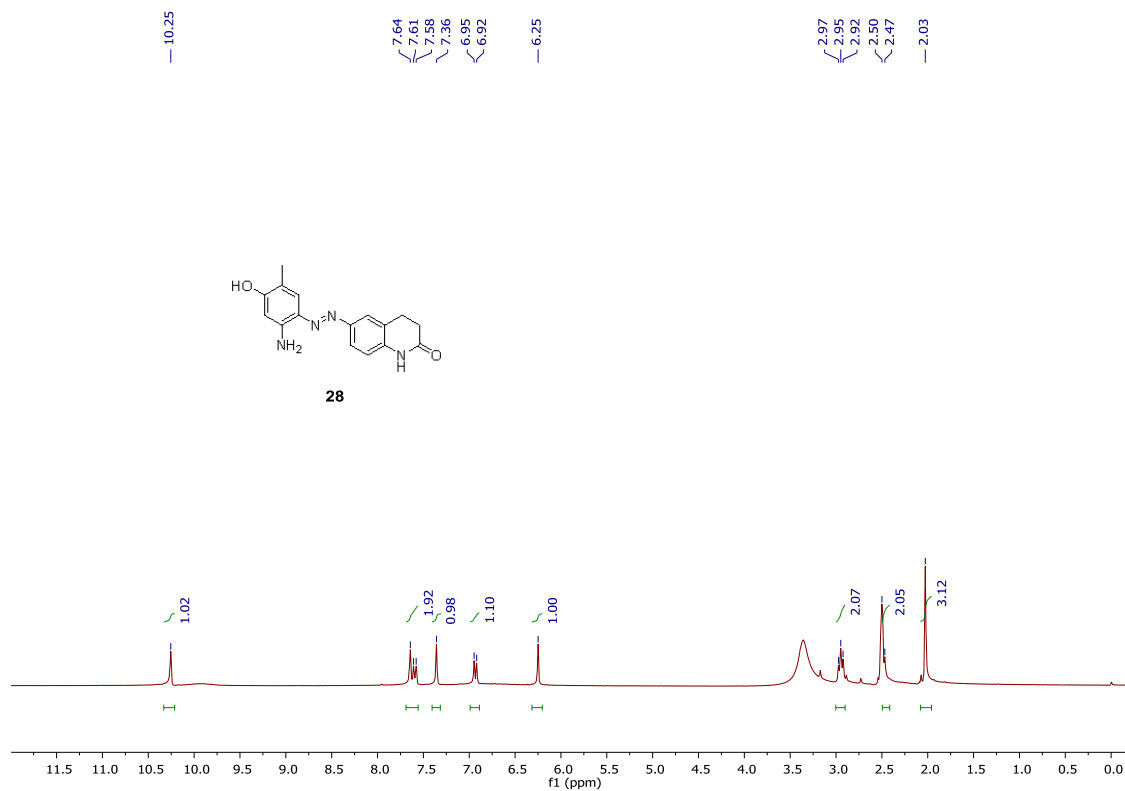



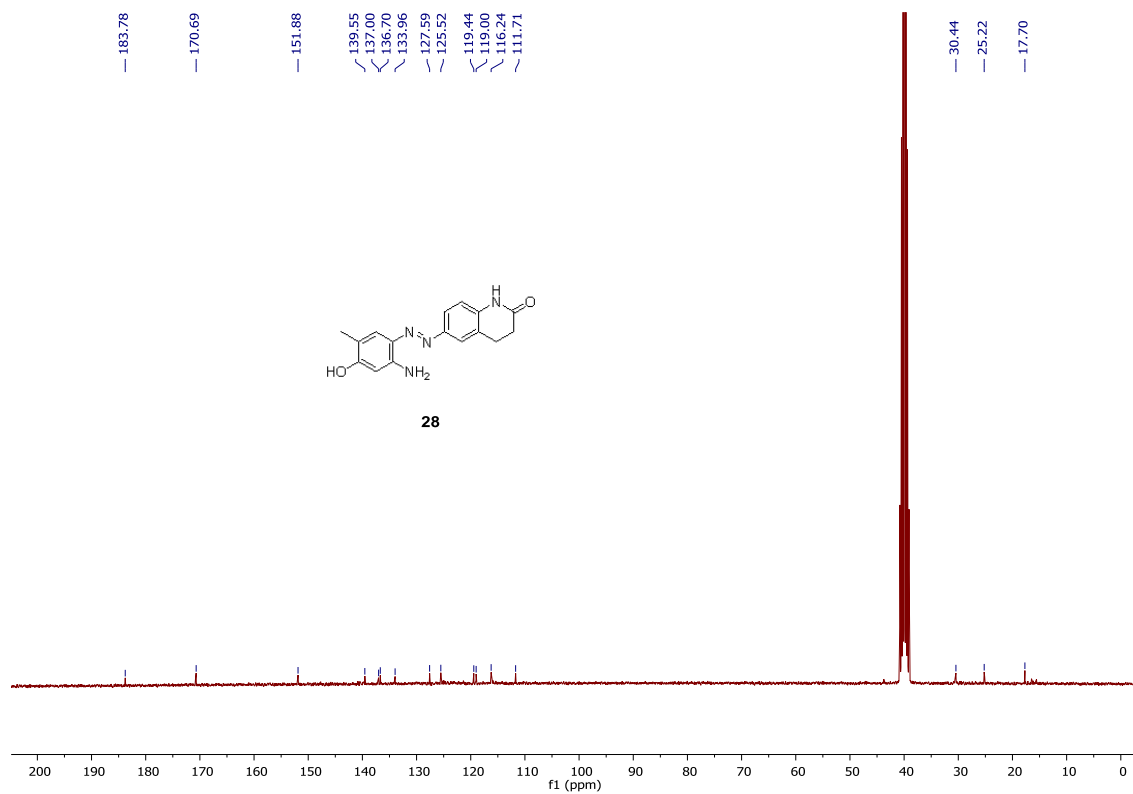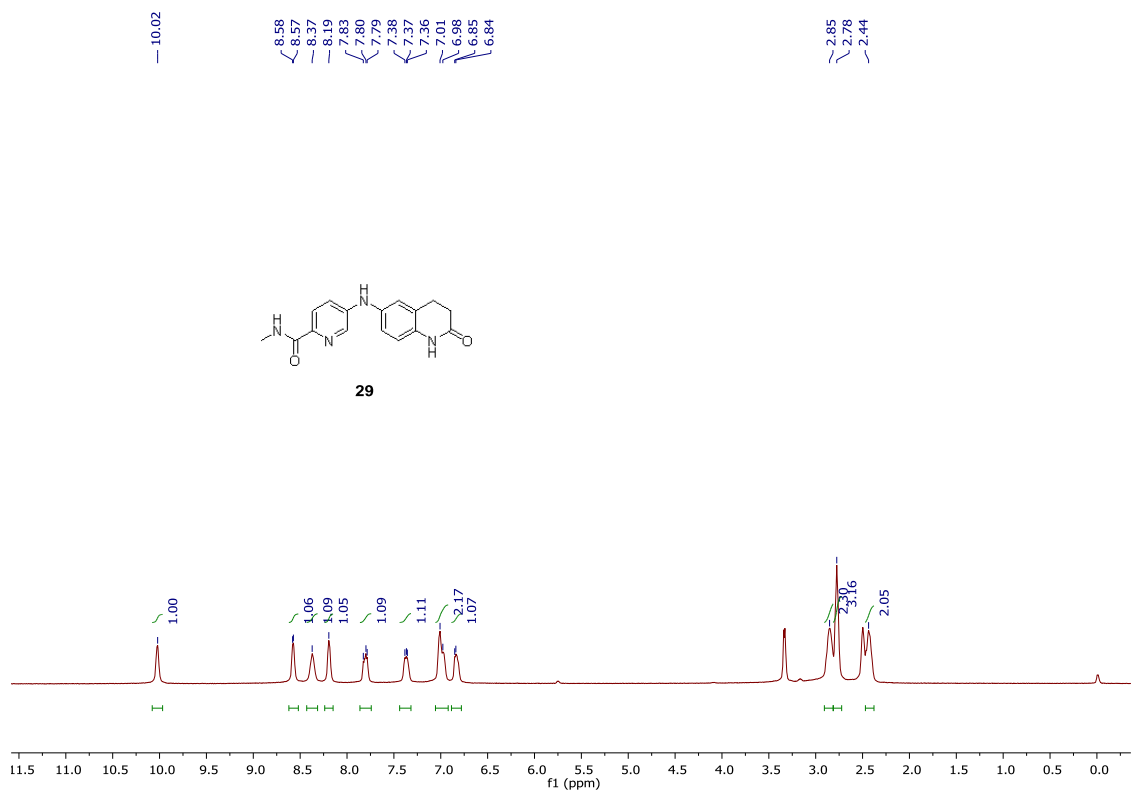

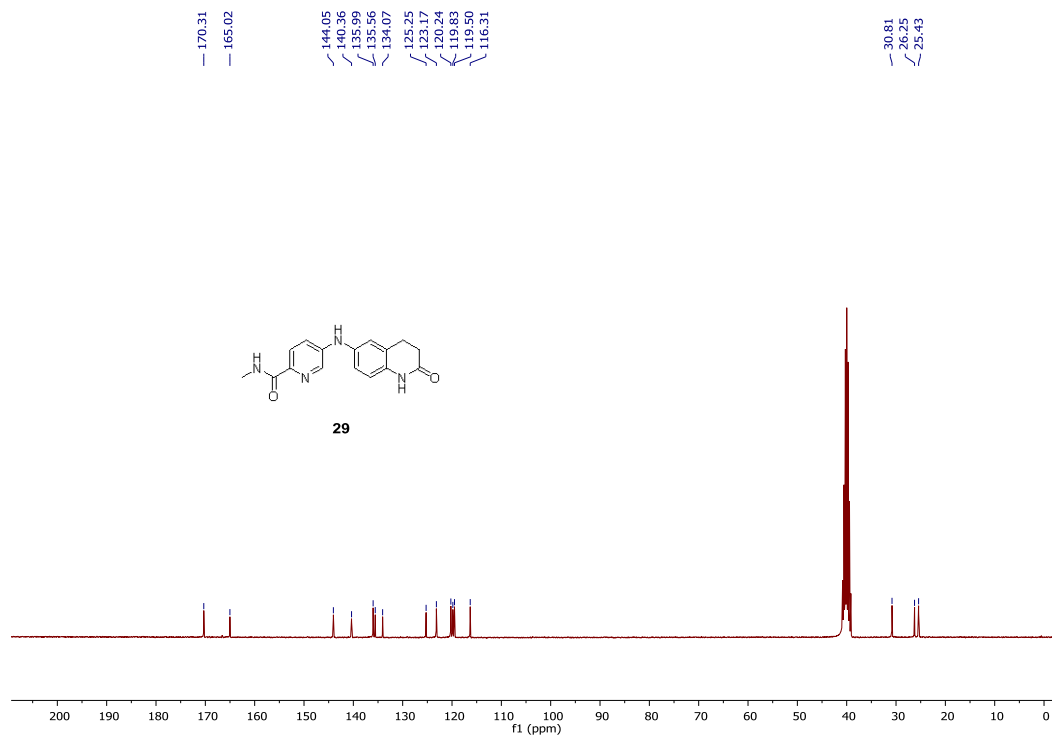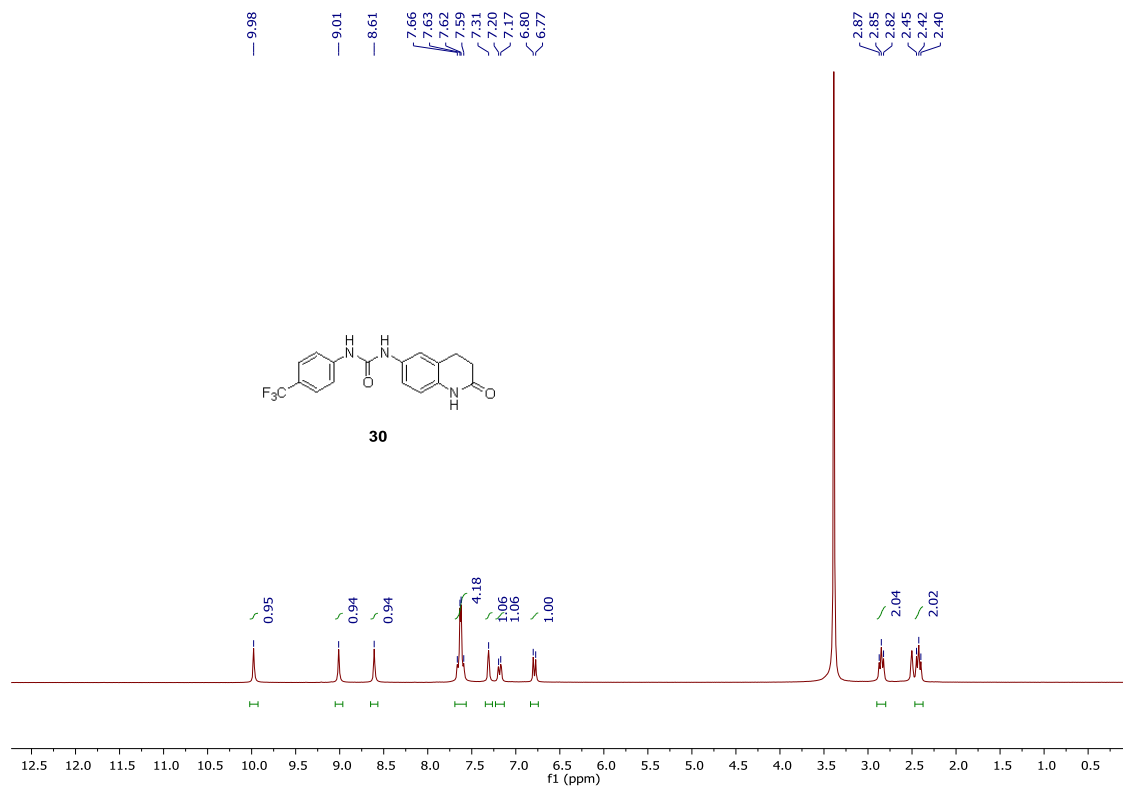

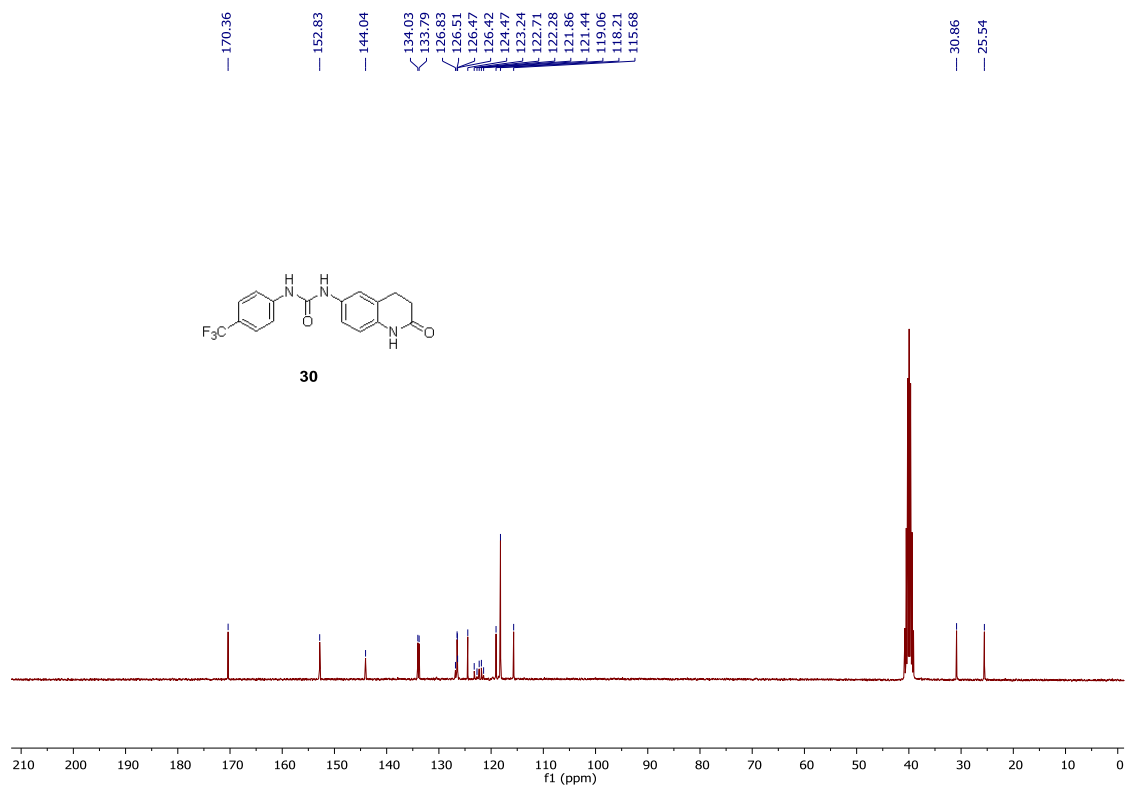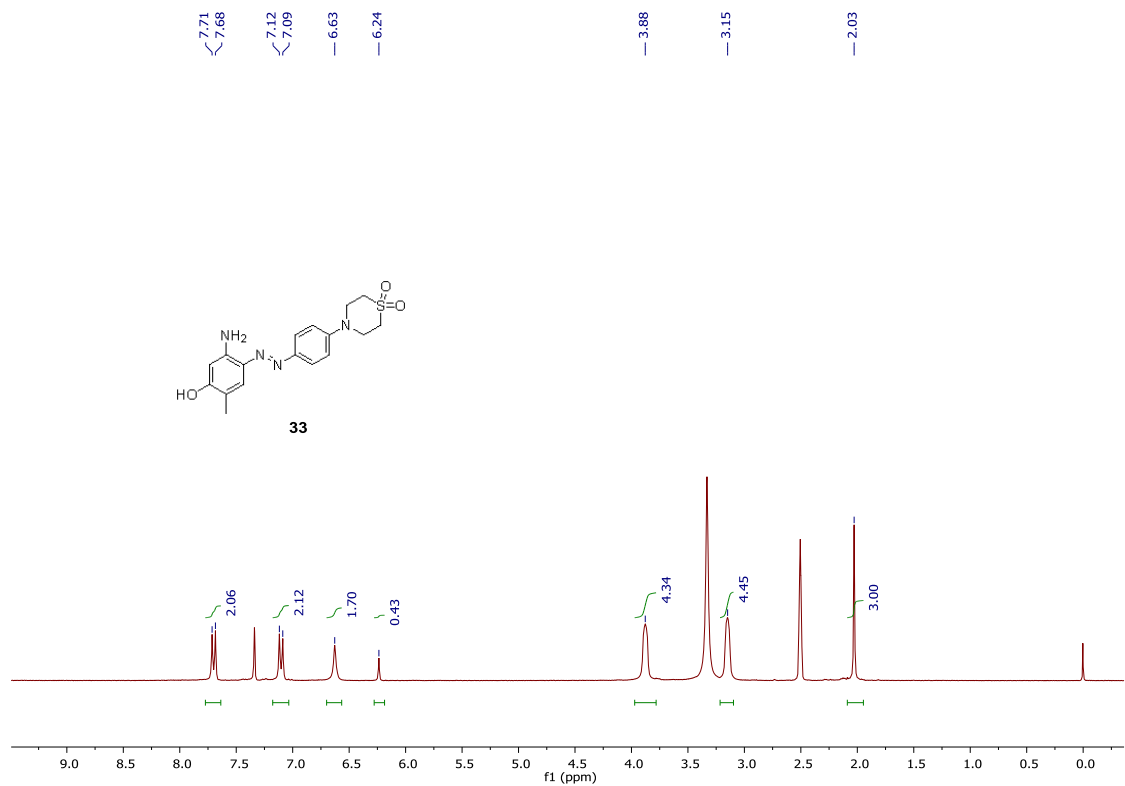

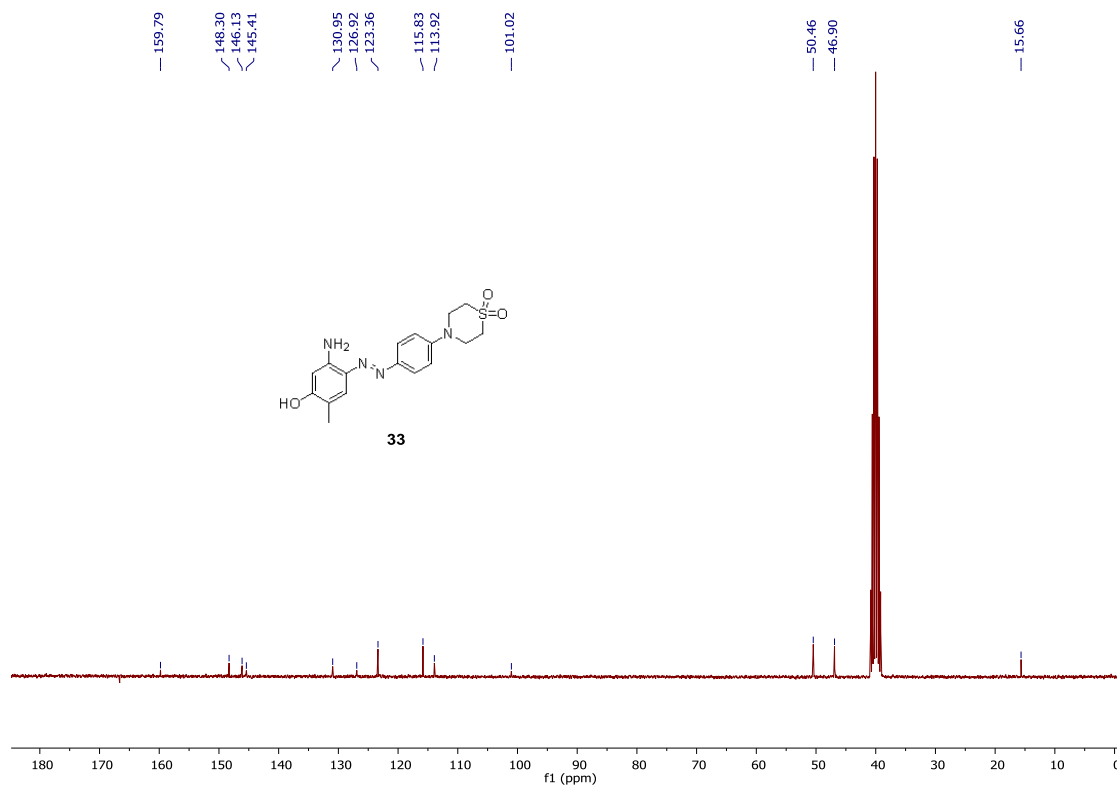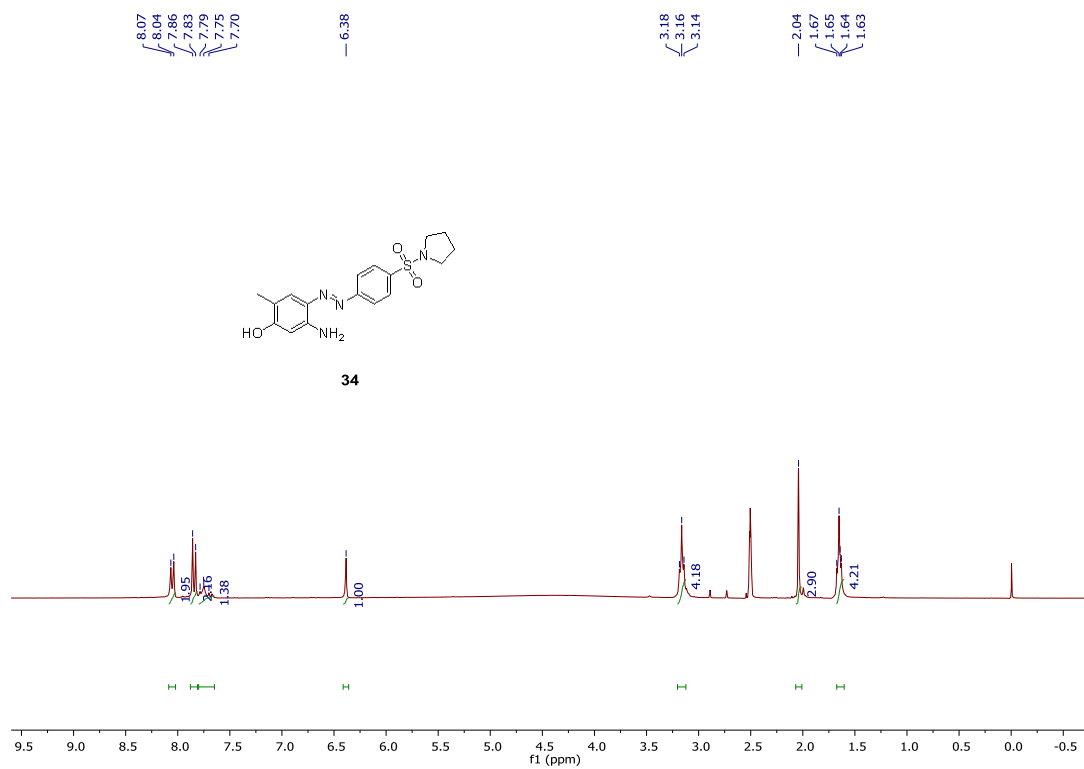

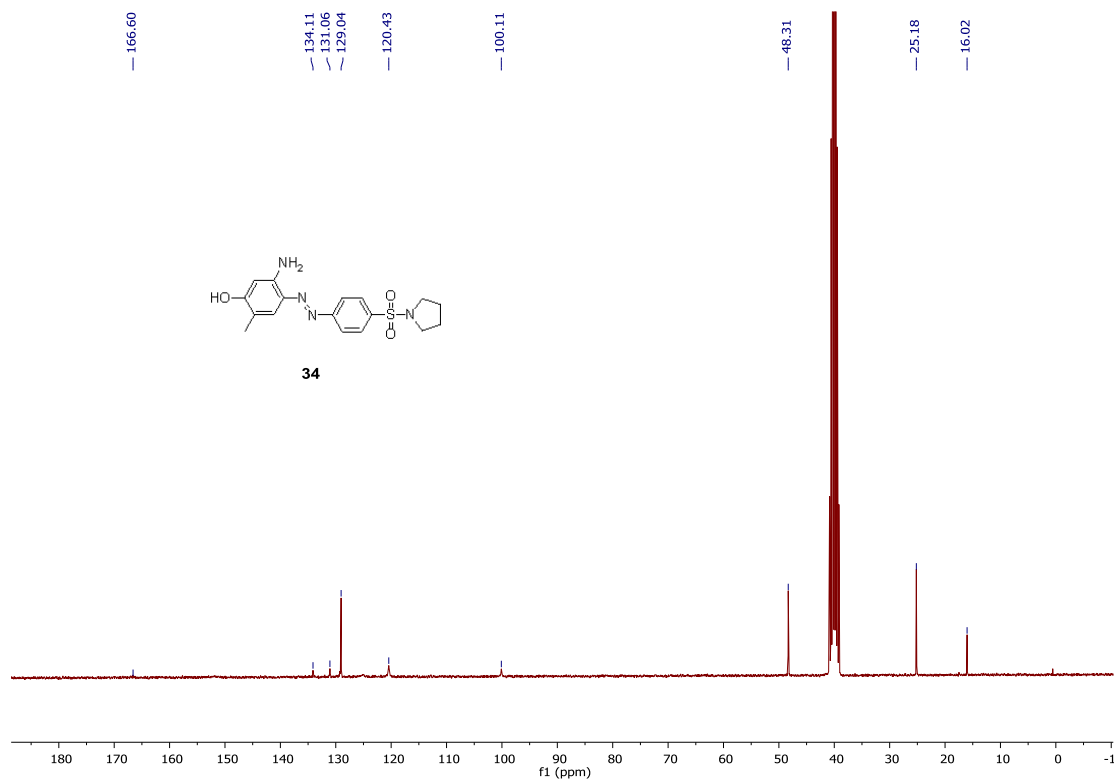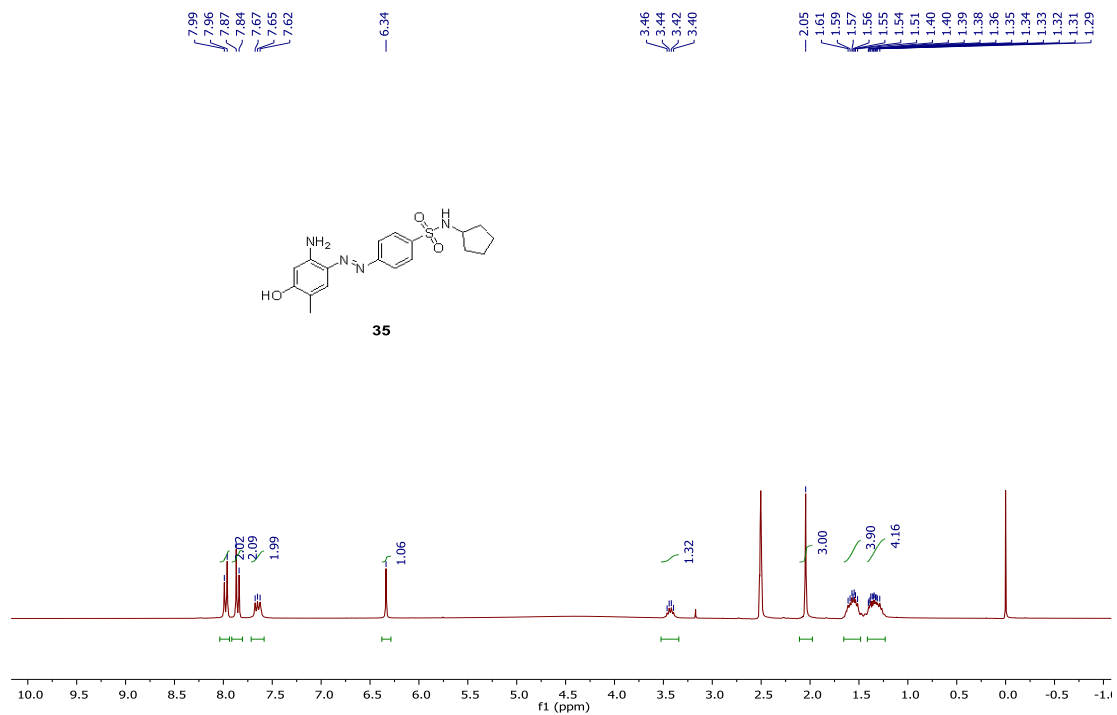

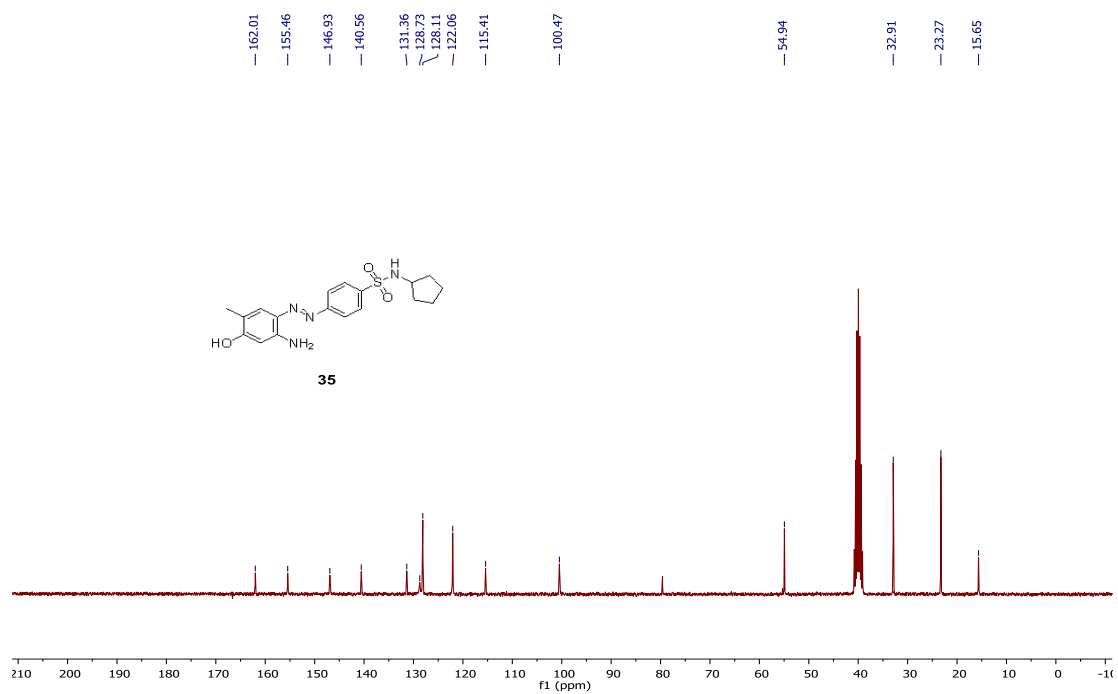

Supplement: NIHMS958578-supplement.pdf [file NIHMS958578-supplement.pdf]
